# Supplementary material for: Neural Progenitor Cells Derived from Human Embryonic Stem Cells as an Origin of Dopaminergic Neurons
Source: Hindawi journal article supplement (doi:10.1155/2015/647437), 2015-01-01
Supplement: f1 [file 647437.f1.pdf]

**Supplementary Table 2. List of antibodies used in this study**

| <b>Antibody</b> | <b>Company, Cat. No.</b> | <b>Dilution</b> |
|-----------------|--------------------------|-----------------|
| <b>SOX1</b>     | Abcam, AB22572           | 1:100           |
| <b>BrdU</b>     | DSHB, G3G4               | 1:1000          |
| <b>MASH1</b>    | ABCAM, AB74065           | 1:1000          |
| <b>Nestin</b>   | Chemicon, MAB5326        | 1:200           |
| <b>TUJ1</b>     | Sigma, T8660             | 1:1000          |
| <b>GFAP</b>     | DAKO, Z0334              | 1:500           |
| <b>GABA</b>     | Sigma, A2050             | 1:200           |
| <b>MAP2</b>     | Chemicon, AB5622         | 1:1000          |
| <b>TH</b>       | Chemicon, MAB318         | 1:200           |
| <b>PSA-NCAM</b> | Chemicon, MAB5324        | 1:200           |
